# Supplementary material for: Graphene-promoted acetalisation of glycerol under acid-free conditions
Source: Royal Society of Chemistry journal article supplement (doi:10.1039/c5gc02316e), 2015-10-22
Supplement: c5gc02316e1.pdf [file c5gc02316e1.pdf]

**Electronic Supplementary Information**

---

**Graphene-Promoted Acetalization of Glycerol under Acid-Free Conditions**

Nicolas Oger,<sup>a</sup> Yuting F. Lin,<sup>a</sup> Erwan Le Grogneq,<sup>a</sup> Franck Rataboul,<sup>b</sup> François-Xavier Felpin<sup>\*a,c</sup>

<sup>a</sup> Université de Nantes, UFR des Sciences et des Techniques, CNRS UMR 6230, CEISAM, 2 rue de la Houssinière, 44322 Nantes Cedex 3, France

<sup>b</sup> Université de Lyon 1, Institut de Recherche sur la Catalyse et l'Environnement de Lyon, IRCELYON, CNRS, 2 Avenue Albert Einstein, 69626 Villeurbanne Cedex, France

<sup>c</sup> Institut Universitaire de France, 103 blvd St Michel, 75005 Paris Cedex 5, France

\*Corresponding author. Tel: (+33) 251 125 422. Email: [fx.felpin@univ-nantes.fr](mailto:fx.felpin@univ-nantes.fr)

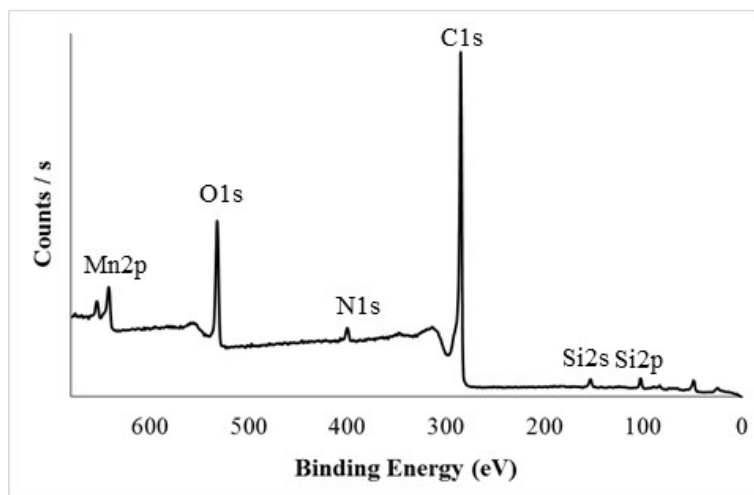

**Fig. S1** Survey scan XPS spectra of unpurified GR

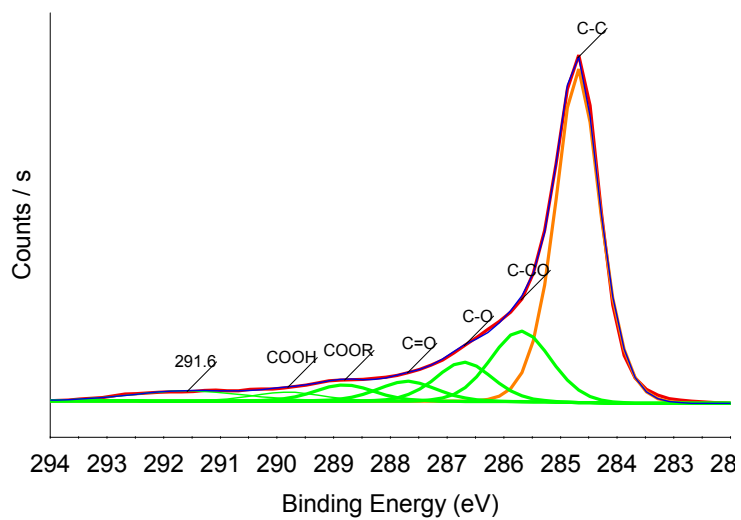

**Fig. S2** High resolution of C 1s XPS spectra of GR after the fifth reuse

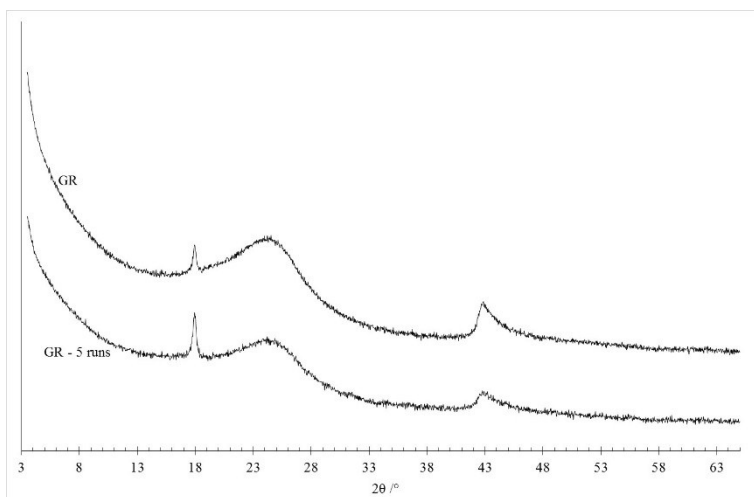

**Fig. S3** XRD patterns of fresh GR and reused GR after the fifth run

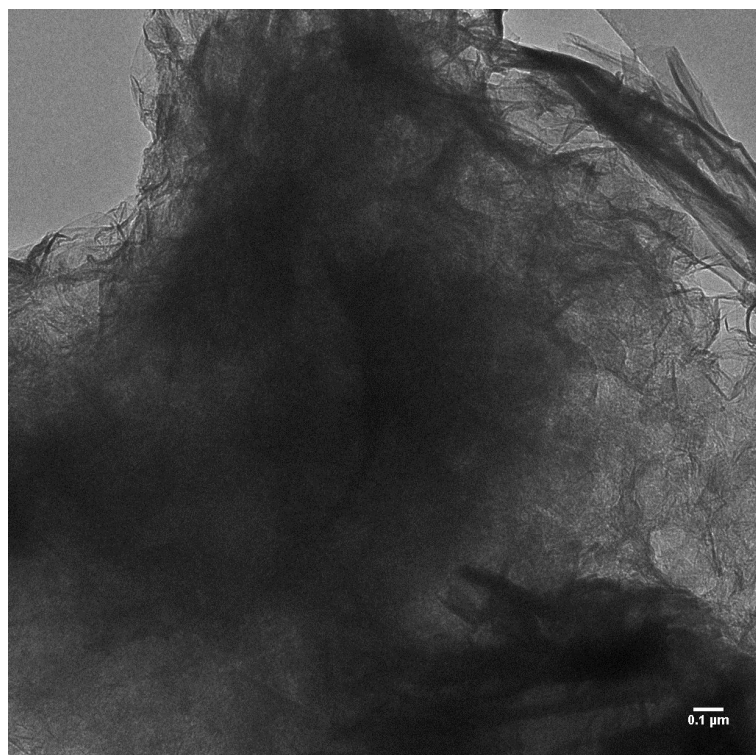

**Fig. S4** TEM image of after the fifth reuse
